# Supplementary material for: Mapping the distribution of neurotransmitters to resting-state functional connectivity in patients with Parkinson’s disease
Source: Research Square preprint supplement (doi:10.21203/rs.3.rs-4567266/v1), 2024-07-18

**Supplementary Table 1**: The 138 regions-of-interest (ROIs) from the automated anatomical labeling 3 (AAL3) atlas are grouped into 8 networks.

| **Network** | **AAL3 id** | | **AAL3 label** |
| --- | --- | --- | --- |
| Visual network (VN) | 47 | 48 | Calcarine |
| 49 | 50 | Cuneus |
| 51 | 52 | Lingual |
| 53 | 54 | Occipital_Sup |
| 55 | 56 | Occipital_Mid |
| 57 | 58 | Occipital_Inf |
| 59 | 60 | Fusiform |
| Sensorimotor network (SMN) | 1 | 2 | Precentral |
| 13 | 14 | Rolandic_Oper |
| 15 | 16 | Supp_Motor_Area |
| 61 | 62 | Postcentral |
| 73 | 74 | Paracentral_Lobule |
| 83 | 84 | Heschl |
| 85 | 86 | Temporal_Sup |
| Attention network (AN) | 33 | 34 | Insula |
| 37 | 38 | Cingulate_Mid |
| 63 | 64 | Parietal_Sup |
| 67 | 68 | SupraMarginal |
| Limbic network (LN) | 17 | 18 | Olfactory |
| 23 | 24 | Rectus |
| 25 | 26 | OFCmed |
| 29 | 30 | OFCpost |
| 41 | 42 | Hippocampus |
| 43 | 44 | ParaHippocampal |
| 87 | 88 | Temporal_Pole_Sup |
| 91 | 92 | Temporal_Pole_Mid |
| 93 | 94 | Temporal_Inf |
| Frontoparietal network (FPN) | 5 | 6 | Frontal_Mid_2 |
| 7 | 8 | Frontal_Inf_Oper |
| 9 | 10 | Frontal_Inf_Tri |
| 27 | 28 | OFCant |
| 65 | 66 | Parietal_Inf |
| 155 | 156 | ACC_sup |
| Default mode network (DMN) | 3 | 4 | Frontal_Sup_2 |
| 11 | 12 | Frontal_Inf_Orb_2 |
| 19 | 20 | Frontal_Sup_Medial |
| 21 | 22 | Frontal_Med_Orb |
| 31 | 32 | OFClat |
| 39 | 40 | Cingulate_Post |
| 69 | 70 | Angular |
| 71 | 72 | Precuneus |
| 89 | 90 | Temporal_Mid |
| 151 | 152 | ACC_sub |
| 153 | 154 | ACC_pre |
| Subcortical network (SUB) | 45 | 46 | Amygdala |
| 75 | 76 | Caudate |
| 77 | 78 | Putamen |
| 79 | 80 | Pallidum |
| 121 | 122 | Thal_AV |
| 123 | 124 | Thal_LP |
| 125 | 126 | Thal_VA |
| 127 | 128 | Thal_VL |
| 129 | 130 | Thal_VPL |
| 131 | 132 | Thal_IL |
| 135 | 136 | Thal_MDm |
| 137 | 138 | Thal_MDl |
| 139 | 140 | Thal_LGN |
| 141 | 142 | Thal_MGN |
| 143 | 144 | Thal_PuI |
| 145 | 146 | Thal_PuM |
| 147 | 148 | Thal_PuA |
| 149 | 150 | Thal_PuL |
| 157 | 158 | N_Acc |
| Brainstem (BN) | 159 | 160 | VTA |
| 161 | 162 | SN_pc |
| 163 | 164 | SN_pr |
| 165 | 166 | Red_N |
| 167 | 168 | LC |
| 169 | | Raphe_D |
| 170 | | Raphe_M |

**Supplementary Table 2**: 11C-PE2I and 11C-DASB PET hotspot and coldspot regions.

|  | **Baseline** | | **Change** | |
| --- | --- | --- | --- | --- |
| **11C-PE2I** | **11C-DASB** | **11C-PE2I** | **11C-DASB** |
| **Hotspot** | Nucleus accumbens (R) | Dorsal raphe nucleus | Gyrus rectus (L) | Lateral orbital gyrus (R) |
| **Coldspot** | Superior parietal gyrus (R) | Lateral orbital gyrus (R) | Nucleus accumbens (R) | Thalamus (R) |

**Supplementary Table 3**: The Steiger's *Z* procedure was used to assess whether the correlation coefficient describing the relationship between functional connectivity and 11C-PE2I PET covariance significantly differed from that describing the relationship between functional connectivity and 11C-DASB PET covariance, over the whole brain as well as within the 8 functional networks. ***** Indicates *p* <0.05; ****** Indicates *p* <0.001

| **Networks** | **Baseline** | | **Follow-up** | |
| --- | --- | --- | --- | --- |
| ***Z*-score** | ***P*-value** | ***Z*-score** | ***P*-value** |
| Whole brain | 1.617 | 0.106 | **6.286** | **<0.001**** |
| Visual network  (VN) | **-2.200** | **0.028*** | -0.463 | 0.643 |
| Sensorimotor network  (SMN) | -0.974 | 0.330 | -0.797 | 0.425 |
| Attention network  (AN) | 0.293 | 0.770 | 0.959 | 0.338 |
| Limbic network  (LN) | 1.601 | 0.109 | **-2.541** | **0.011*** |
| Frontoparietal network  (FPN) | 0.073 | 0.942 | 1.838 | 0.066 |
| Default mode network  (DMN) | 0.094 | 0.925 | **-3.457** | **<0.001**** |
| Subcortical network  (SUB) | **4.223** | **<0.001**** | -0.242 | 0.809 |
| Brainstem network  (BN) | 1.674 | 0.094 | **2.664** | **0.008*** |

**Supplementary Table 4**: Brain regions in which the association between FC and PET uptake is correlated with motor scale in PD patients.

| **Network** | **Brain regions** | **Association between functional connectivity and 11C-PE2I PET  (*β*-values)** | | | | **Association between functional connectivity and 11C-DASB PET  (*β*-values)** | | | |
| --- | --- | --- | --- | --- | --- | --- | --- | --- | --- |
| **Total UPDRS-III scores** | | **Bradykinesia-Rigidity**  **sub-score** | | **Total UPDRS-III scores** | | **Bradykinesia-Rigidity**  **sub-score** | |
| ***r*** | ***p*** | ***r*** | ***p*** | ***r*** | ***p*** | ***r*** | ***p*** |
| **VN** | Calcarine fissure (L) | -0.493 | 0.006 | -0.542 | 0.002 | -0.477 | 0.008 | -0.538 | 0.002 |
| Calcarine fissure (R) | -0.398 | 0.029 | -0.461 | 0.01 | -0.43 | 0.018 | -0.476 | 0.008 |
| Cuneus (L) | -0.491 | 0.006 | -0.451 | 0.012 | -0.554 | 0.001 | -0.557 | 0.001 |
| Cuneus (R) |  |  | -0.426 | 0.019 | -0.444 | 0.014 | -0.537 | 0.002 |
| Lingual gyrus (L) |  |  | -0.43 | 0.018 |  |  | -0.442 | 0.015 |
| Lingual gyrus (R) |  |  | -0.39 | 0.033 |  |  |  |  |
| Inferior occipital gyrus (L) |  |  | -0.402 | 0.028 |  |  | -0.395 | 0.031 |
| Middle occipital gyrus (L) | -0.382 | 0.037 | -0.532 | 0.002 | -0.37 | 0.044 | -0.508 | 0.004 |
| Middle occipital gyrus (R) |  |  | -0.511 | 0.004 |  |  | -0.435 | 0.016 |
| Superior occipital gyrus (L) | -0.52 | 0.003 | -0.553 | 0.002 | -0.496 | 0.005 | -0.467 | 0.009 |
| Superior occipital gyrus (R) |  |  |  |  |  |  | -0.402 | 0.028 |
| **SMN** | Heschl’s gyrus (L) |  |  | -0.37 | 0.044 |  |  |  |  |
| Paracentral lobule (R) |  |  | -0.396 | 0.03 |  |  |  |  |
| Postcentral gyrus (L) | -0.503 | 0.005 | -0.609 | 0 | -0.539 | 0.002 | -0.59 | 0.001 |
| Postcentral gyrus (R) |  |  | -0.364 | 0.048 |  |  |  |  |
| Precentral gyrus (L) | -0.363 | 0.049 | -0.548 | 0.002 |  |  | -0.435 | 0.016 |
| Precentral gyrus (R) | -0.384 | 0.036 | -0.449 | 0.013 |  |  | -0.367 | 0.046 |
| Rolandic operculum (L) |  |  | -0.365 | 0.047 |  |  |  |  |
| Superior temporal gyrus (L) | -0.459 | 0.011 | -0.62 | 0 | -0.489 | 0.006 | -0.574 | 0.001 |
| Superior temporal gyrus (R) | -0.385 | 0.036 | -0.5 | 0.005 | -0.424 | 0.02 | -0.459 | 0.011 |
| **AN** | Superior parietal gyrus (L) | -0.491 | 0.006 | -0.615 | 0 | -0.515 | 0.004 | -0.582 | 0.001 |
| Superior parietal gyrus (R) | -0.606 | 0 | -0.729 | 0 | -0.515 | 0.004 | -0.581 | 0.001 |
| Supramarginal gyrus (L) |  |  | -0.383 | 0.037 |  |  |  |  |
| **LN** | Parahippocampal gyrus (L) |  |  |  |  | -0.381 | 0.038 | -0.394 | 0.031 |
| Inferior temporal gyrus (L) | -0.488 | 0.006 | -0.503 | 0.005 | -0.382 | 0.037 | -0.415 | 0.023 |
| Inferior temporal gyrus (R) |  |  | -0.379 | 0.039 |  |  |  |  |
| Middle temporal gyrus (R) |  |  | -0.365 | 0.048 |  |  |  |  |
| Superior temporal gyrus (R) | -0.369 | 0.045 | -0.388 | 0.034 |  |  |  |  |
| **FPN** | Inferior frontal gyrus (L) |  |  | -0.399 | 0.029 |  |  |  |  |
| Inferior parietal gyrus (L) | -0.396 | 0.03 | -0.505 | 0.004 |  |  | -0.372 | 0.043 |
| **DMN** | Angular gyrus (L) | -0.449 | 0.013 | -0.395 | 0.031 | -0.461 | 0.01 | -0.364 | 0.048 |
| Lateral orbital gyrus (L) | -0.361 | 0.05 | -0.447 | 0.013 |  |  |  |  |
| Precuneus (R) |  |  | -0.42 | 0.021 |  |  | -0.376 | 0.041 |
| Middle temporal gyrus (L) | -0.588 | 0.001 | -0.713 | 0 | -0.563 | 0.001 | -0.681 | 0 |
| Middle temporal gyrus (R) | -0.379 | 0.039 | -0.576 | 0.001 |  |  | -0.52 | 0.003 |
| **SUB** | Amygdala (L) | -0.487 | 0.006 | -0.437 | 0.016 | -0.458 | 0.011 | -0.415 | 0.022 |
| **BN** | Red nucleus (R) | 0.459 | 0.011 | 0.472 | 0.009 |  |  |  |  |

**Supplementary Table 5**: Brain regions in which the association between FC and 11C-PE2I PET uptake is correlated with non-motor scale in PD patients.

| **Network** | **Brain regions** | **UPDRS-I A scores** | | **UPDRS-I B scores** | | **Beck Depression Inventory (BDI)** | | **Non Motor Symptom Scale (NMSS)** | | **Apathy Evaluation Scale (AES)** | | **Addenbrooke’s Cognitive Examination (ACE-R)** | | **Mini-mental State Examination (MMSE)** | | **PD Sleep Scale (PDSS)** | |
| --- | --- | --- | --- | --- | --- | --- | --- | --- | --- | --- | --- | --- | --- | --- | --- | --- | --- |
| ***r*** | ***p*** | ***r*** | ***p*** | ***r*** | ***p*** | ***r*** | ***p*** | ***r*** | ***p*** | ***r*** | ***p*** | ***r*** | ***p*** | ***r*** | ***p*** |
| **VN** | Calcarine fissure (L) |  |  |  |  |  |  |  |  | 0.446 | 0.023 | 0.400 | 0.035 |  |  |  |  |
| Cuneus (L) | 0.394 | 0.038 |  |  |  |  |  |  |  |  |  |  |  |  |  |  |
| Inferior occipital gyrus (L) |  |  |  |  | 0.422 | 0.025 |  |  |  |  |  |  |  |  |  |  |
| Fusiform gyrus (L) |  |  |  |  |  |  |  |  |  |  |  |  | 0.415 | 0.028 |  |  |
| Fusiform gyrus (R) |  |  |  |  |  |  |  |  |  |  |  |  | 0.417 | 0.027 |  |  |
| **SMN** | Precentral gyrus (L) |  |  | -0.403 | 0.037 |  |  |  |  |  |  | 0.398 | 0.036 |  |  |  |  |
| Precentral gyrus (R) |  |  |  |  |  |  | -0.478 | 0.016 |  |  |  |  |  |  |  |  |
| Postcentral gyrus (L) |  |  |  |  |  |  |  |  |  |  | 0.417 | 0.027 |  |  |  |  |
| Postcentral gyrus (R) |  |  | -0.514 | 0.006 |  |  | -0.535 | 0.006 |  |  |  |  |  |  |  |  |
| Paracentral lobule (R) |  |  | -0.487 | 0.010 |  |  | -0.408 | 0.043 |  |  |  |  | 0.430 | 0.022 |  |  |
| **AN** | Superior parietal gyrus (R) |  |  |  |  |  |  |  |  |  |  | 0.431 | 0.022 |  |  |  |  |
| **LN** | Olfactory cortex (L) |  |  |  |  | -0.409 | 0.031 |  |  |  |  |  |  |  |  |  |  |
| Olfactory cortex (R) |  |  |  |  | -0.427 | 0.023 |  |  |  |  |  |  |  |  |  |  |
| Medial orbital gyrus (L) |  |  |  |  |  |  |  |  |  |  |  |  | 0.417 | 0.027 |  |  |
| Posterior orbital gyrus (L) |  |  |  |  |  |  |  |  | 0.468 | 0.016 |  |  |  |  |  |  |
| Hippocampus (L) |  |  |  |  |  |  |  |  |  |  |  |  | 0.455 | 0.015 |  |  |
| Parahippocampal gyrus (L) |  |  |  |  |  |  |  |  |  |  |  |  | 0.463 | 0.013 |  |  |
| Parahippocampal gyrus (R) |  |  |  |  |  |  |  |  |  |  |  |  | 0.402 | 0.034 |  |  |
| Inferior temporal gyrus (L) |  |  |  |  |  |  |  |  | 0.460 | 0.018 |  |  |  |  |  |  |
| **FPN** | Anterior cingulate cortex (L) |  |  |  |  |  |  |  |  |  |  | -0.494 | 0.008 |  |  |  |  |
| Anterior cingulate cortex (R) |  |  |  |  |  |  |  |  |  |  | -0.498 | 0.007 |  |  |  |  |
| **DMN** | IFG pars orbitalis (R) |  |  |  |  |  |  |  |  | 0.393 | 0.047 |  |  |  |  |  |  |
| Lateral orbital gyrus (L) |  |  |  |  | 0.411 | 0.030 |  |  |  |  |  |  |  |  |  |  |
| Middle temporal gyrus (L) |  |  |  |  |  |  |  |  |  |  | 0.403 | 0.034 |  |  |  |  |
| Middle temporal gyrus (R) |  |  |  |  |  |  |  |  |  |  | 0.412 | 0.029 |  |  |  |  |
| **SUB** | Caudate (L) |  |  |  |  | -0.472 | 0.011 |  |  |  |  |  |  |  |  |  |  |
| Caudate (R) |  |  |  |  | -0.422 | 0.025 |  |  |  |  |  |  |  |  |  |  |
| Putamen (L) |  |  |  |  | -0.408 | 0.031 |  |  |  |  |  |  |  |  | 0.574 | 0.002 |
| Putamen (R) | -0.387 | 0.042 |  |  |  |  |  |  |  |  |  |  |  |  | 0.486 | 0.012 |
| Pallidum (R) | -0.374 | 0.050 |  |  |  |  |  |  |  |  |  |  |  |  | 0.542 | 0.004 |
| Ventral anterior (L) |  |  |  |  |  |  |  |  |  |  |  |  |  |  | 0.417 | 0.034 |
| Ventral anterior (R) |  |  |  |  |  |  |  |  |  |  |  |  |  |  | 0.445 | 0.023 |
| Ventral lateral (L) |  |  |  |  |  |  |  |  |  |  |  |  |  |  | 0.423 | 0.031 |
| Intralaminar (L) |  |  |  |  |  |  |  |  |  |  | -0.431 | 0.022 |  |  |  |  |
| Lateral geniculate (L) |  |  |  |  |  |  |  |  |  |  |  |  | 0.552 | 0.002 |  |  |
| Lateral geniculate (R) |  |  |  |  |  |  |  |  |  |  |  |  | 0.433 | 0.021 |  |  |
| Medial Geniculate (L) | 0.401 | 0.035 |  |  |  |  |  |  |  |  |  |  |  |  |  |  |
| **BN** | Substantia nigra, pars reticulata (R) |  |  |  |  |  |  |  |  |  |  | -0.392 | 0.039 |  |  |  |  |
| Red nucleus (L) |  |  |  |  |  |  |  |  |  |  |  |  |  |  | 0.399 | 0.044 |
| Red nucleus (R) |  |  |  |  |  |  |  |  |  |  | -0.491 | 0.008 |  |  | 0.465 | 0.017 |
| Raphe nucleus, median |  |  |  |  |  |  |  |  |  |  | -0.434 | 0.021 |  |  |  |  |

**Supplementary Table 6**: Brain regions in which the association between FC and 11C-DASB PET uptake is correlated with non-motor scale in PD patients.

| **Network** | **Brain regions** | **UPDRS-I A scores** | | **UPDRS-I B scores** | | **Beck Depression Inventory (BDI)** | | **Non Motor Symptom Scale (NMSS)** | | **Apathy Evaluation Scale (AES)** | | **Addenbrooke’s Cognitive Examination (ACE-R)** | | **Mini-mental State Examination (MMSE)** | | **PD Sleep Scale (PDSS)** | |
| --- | --- | --- | --- | --- | --- | --- | --- | --- | --- | --- | --- | --- | --- | --- | --- | --- | --- |
| ***r*** | ***p*** | ***r*** | ***p*** | ***r*** | ***p*** | ***r*** | ***p*** | ***r*** | ***p*** | ***r*** | ***p*** | ***r*** | ***p*** | ***r*** | ***p*** |
| **VN** | Calcarine fissure (L) |  |  |  |  |  |  |  |  |  |  | 0.455 | 0.015 |  |  |  |  |
| Calcarine fissure (R) |  |  |  |  |  |  |  |  |  |  | 0.389 | 0.041 |  |  |  |  |
| Cuneus (L) |  |  |  |  |  |  |  |  |  |  | 0.429 | 0.023 |  |  |  |  |
| Cuneus (R) |  |  |  |  |  |  |  |  |  |  | 0.402 | 0.034 |  |  |  |  |
| Superior occipital gyrus (L) |  |  |  |  |  |  |  |  | 0.415 | 0.035 |  |  |  |  |  |  |
| Fusiform gyrus (L) |  |  | -0.381 | 0.050 |  |  |  |  |  |  |  |  | 0.479 | 0.010 |  |  |
| Fusiform gyrus (R) |  |  |  |  |  |  |  |  |  |  |  |  | 0.464 | 0.013 |  |  |
| **SMN** | Precentral gyrus (L) |  |  | -0.448 | 0.019 |  |  |  |  |  |  |  |  |  |  |  |  |
| Precentral gyrus (R) |  |  | -0.549 | 0.003 |  |  | -0.448 | 0.025 |  |  |  |  | 0.379 | 0.047 |  |  |
| Postcentral gyrus (L) |  |  |  |  |  |  |  |  |  |  | 0.436 | 0.020 |  |  |  |  |
| Postcentral gyrus (R) |  |  | -0.499 | 0.008 |  |  | -0.413 | 0.040 |  |  |  |  |  |  |  |  |
| Paracentral lobule (R) |  |  | -0.522 | 0.005 |  |  |  |  |  |  |  |  | 0.374 | 0.050 |  |  |
| Superior temporal gyrus (L) |  |  |  |  |  |  |  |  |  |  | 0.424 | 0.025 |  |  |  |  |
| **AN** | Superior parietal gyrus (L) |  |  |  |  |  |  |  |  |  |  | 0.451 | 0.016 |  |  |  |  |
| Superior parietal gyrus (R) |  |  |  |  |  |  |  |  |  |  | 0.453 | 0.016 |  |  |  |  |
| **LN** | Olfactory cortex (L) |  |  |  |  | -0.385 | 0.043 |  |  |  |  |  |  |  |  |  |  |
| Olfactory cortex (R) |  |  |  |  | -0.382 | 0.045 |  |  |  |  |  |  |  |  |  |  |
| Gyrus rectus (L) |  |  |  |  | -0.385 | 0.043 |  |  |  |  |  |  |  |  |  |  |
| Medial orbital gyrus (L) |  |  |  |  |  |  |  |  |  |  |  |  | 0.444 | 0.018 |  |  |
| Posterior orbital gyrus (L) |  |  |  |  |  |  |  |  | 0.502 | 0.009 |  |  |  |  |  |  |
| Hippocampus (L) |  |  |  |  |  |  |  |  |  |  |  |  | 0.523 | 0.004 |  |  |
| Parahippocampal gyrus (L) |  |  |  |  | -0.382 | 0.045 |  |  |  |  | 0.430 | 0.022 | 0.557 | 0.002 |  |  |
| Parahippocampal gyrus (R) |  |  |  |  |  |  |  |  |  |  |  |  | 0.495 | 0.007 |  |  |
| Temporal pole: middle temporal gyrus (L) |  |  |  |  | -0.395 | 0.038 |  |  |  |  |  |  |  |  |  |  |
| Temporal pole: middle temporal gyrus (R) |  |  |  |  |  |  |  |  |  |  | 0.426 | 0.024 |  |  |  |  |
| Inferior temporal gyrus (L) |  |  | -0.468 | 0.014 |  |  |  |  |  |  | 0.382 | 0.045 |  |  |  |  |
| **FPN** | Middle frontal gyrus (R) |  |  |  |  |  |  |  |  | 0.393 | 0.047 |  |  |  |  |  |  |
| Anterior orbital gyrus (R) |  |  |  |  |  |  |  |  |  |  |  |  | 0.388 | 0.041 |  |  |
| Superior frontal gyrus (L) |  |  |  |  | -0.439 | 0.019 |  |  |  |  |  |  |  |  |  |  |
| Angular gyrus (R) |  |  |  |  |  |  |  |  |  |  | 0.430 | 0.022 |  |  |  |  |
| Precuneus (L) |  |  | -0.394 | 0.042 |  |  |  |  |  |  |  |  |  |  |  |  |
| Precuneus (R) |  |  | -0.387 | 0.046 |  |  |  |  |  |  |  |  |  |  |  |  |
| Middle temporal gyrus (L) |  |  |  |  |  |  |  |  |  |  | 0.501 | 0.007 |  |  |  |  |
| Middle temporal gyrus (R) |  |  |  |  |  |  |  |  |  |  | 0.485 | 0.009 |  |  |  |  |
| **SUB** | Caudate (L) |  |  |  |  | -0.514 | 0.005 |  |  |  |  |  |  |  |  |  |  |
| Caudate (R) |  |  |  |  | -0.446 | 0.017 |  |  |  |  |  |  |  |  |  |  |
| Putamen (L) |  |  |  |  |  |  |  |  |  |  |  |  |  |  | 0.394 | 0.047 |
| Putamen (R) | -0.480 | 0.010 |  |  | -0.389 | 0.041 |  |  |  |  |  |  |  |  | 0.542 | 0.004 |
| Pallidum (R) |  |  |  |  |  |  |  |  |  |  |  |  |  |  | 0.540 | 0.004 |
| Thalamus Anteroventral Nucleus (L) | -0.396 | 0.037 |  |  |  |  |  |  |  |  |  |  |  |  | 0.428 | 0.029 |
| Thalamus Anteroventral Nucleus (R) |  |  |  |  |  |  |  |  | -0.391 | 0.048 |  |  |  |  | 0.410 | 0.038 |
| Ventral anterior (L) |  |  |  |  |  |  |  |  |  |  |  |  |  |  | 0.503 | 0.009 |
| Ventral anterior (R) |  |  |  |  |  |  |  |  |  |  |  |  |  |  | 0.556 | 0.003 |
| Ventral lateral (L) | -0.377 | 0.048 |  |  |  |  |  |  |  |  |  |  |  |  | 0.489 | 0.011 |
| Intralaminar (R) |  |  |  |  |  |  |  |  |  |  |  |  |  |  | 0.506 | 0.008 |
| Mediodorsal lateral parvocellular (L) |  |  |  |  |  |  |  |  |  |  |  |  |  |  | 0.411 | 0.037 |
| Mediodorsal lateral parvocellular (R) |  |  |  |  |  |  |  |  |  |  |  |  |  |  | 0.395 | 0.046 |
| Lateral geniculate (L) |  |  |  |  |  |  |  |  |  |  |  |  | 0.541 | 0.003 |  |  |
| Lateral geniculate (R) |  |  |  |  |  |  |  |  |  |  |  |  | 0.465 | 0.013 |  |  |
| **BN** | Substantia nigra, pars compacta (L) |  |  |  |  |  |  |  |  |  |  |  |  |  |  | 0.492 | 0.011 |
| Red nucleus (L) |  |  |  |  |  |  |  |  |  |  |  |  |  |  | 0.397 | 0.045 |
| Red nucleus (R) |  |  |  |  |  |  |  |  |  |  |  |  |  |  | 0.441 | 0.024 |

**Supplementary Figure 1**: Analysis pipeline for assessing the association between group-average functional connectivity of the seed ROI and PET uptakes of the target ROIs.


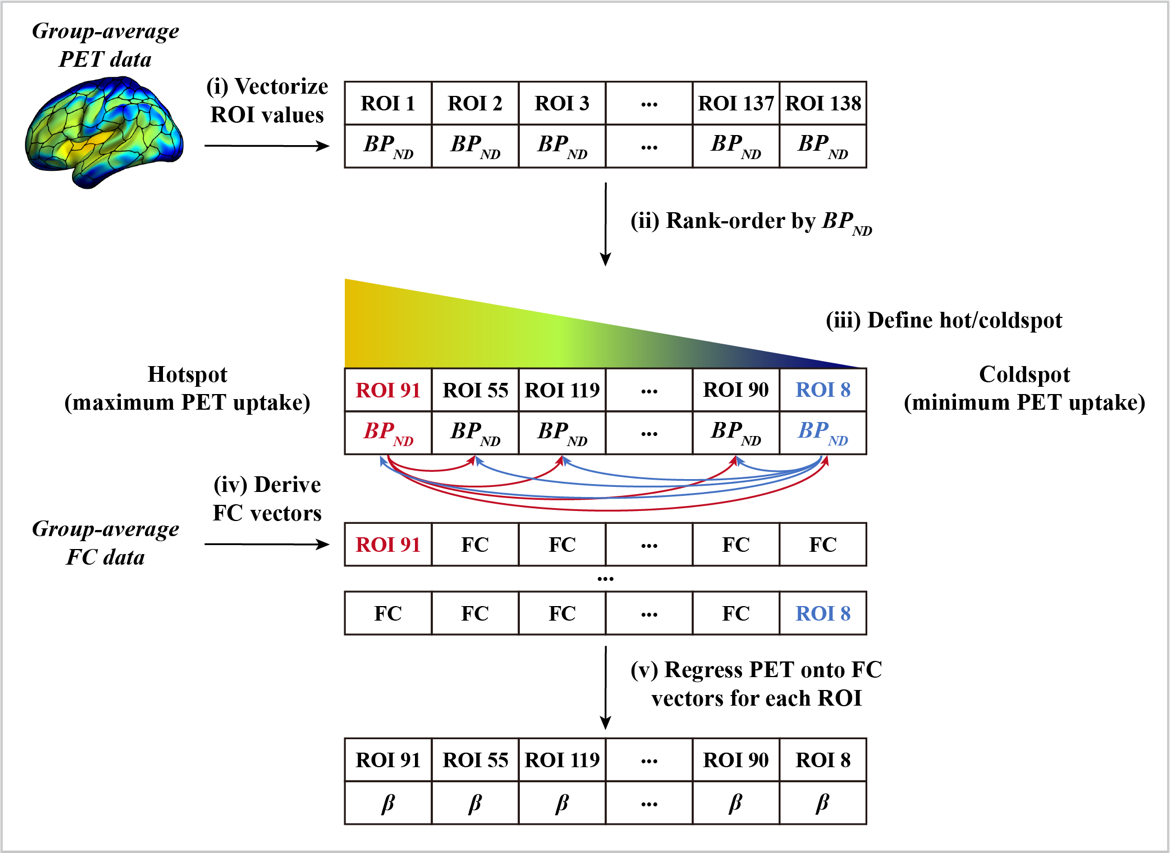


**Supplementary Figure 2**: Analysis pipeline for assessing the association between FC of the seed ROI and PET uptakes of the target ROIs for each PD patient and evaluating how this relates to disease severity.


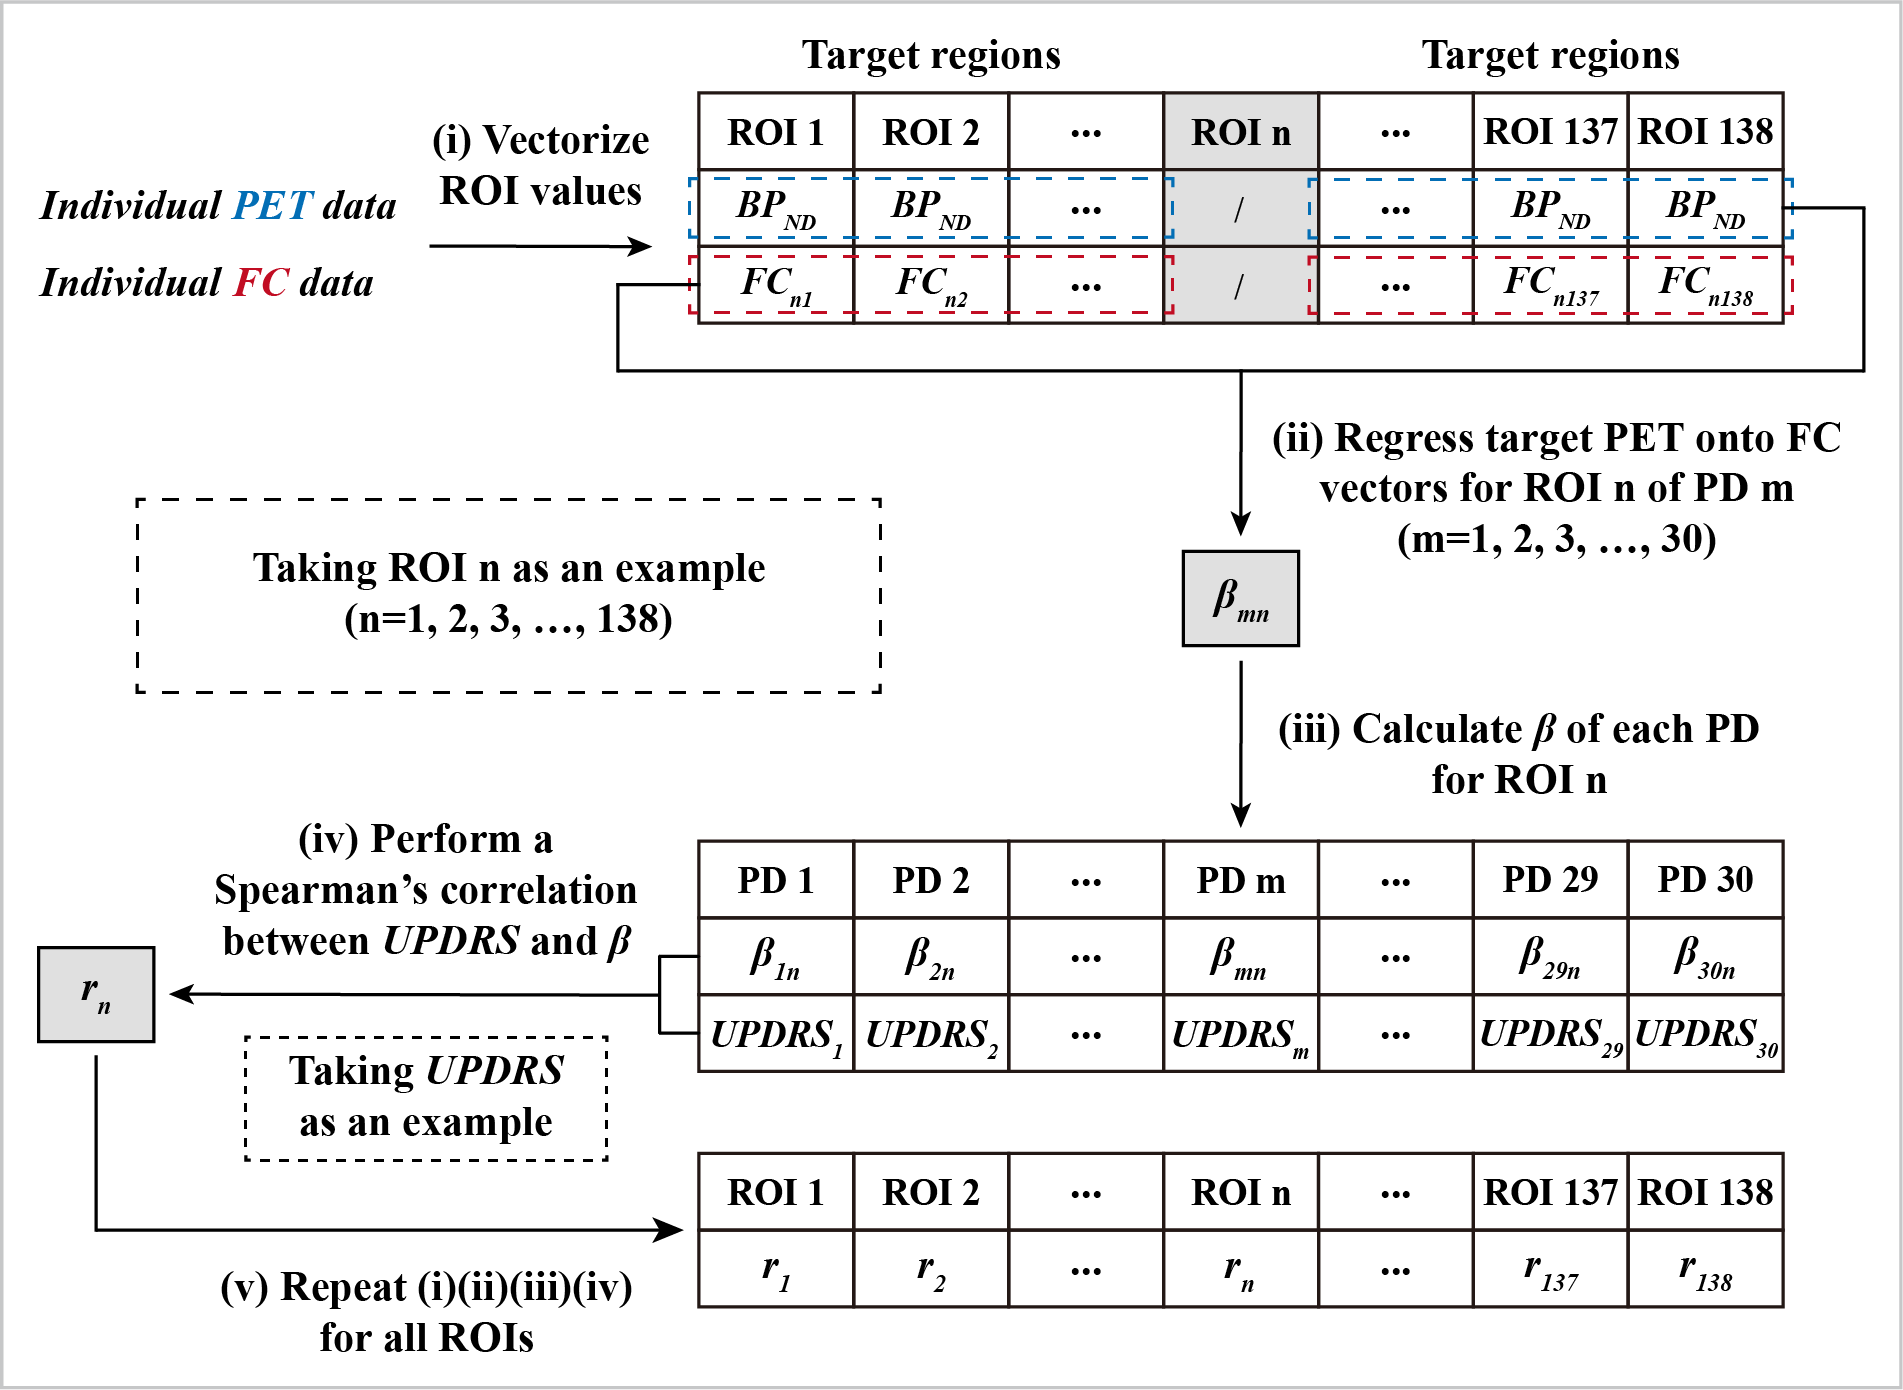


**Supplementary Figure 3**: Analysis pipeline for assessing the association between baseline FC of the seed ROI and change in PET uptakes of the target ROIs for each PD patient and evaluating how this relates to changes in disease severity.


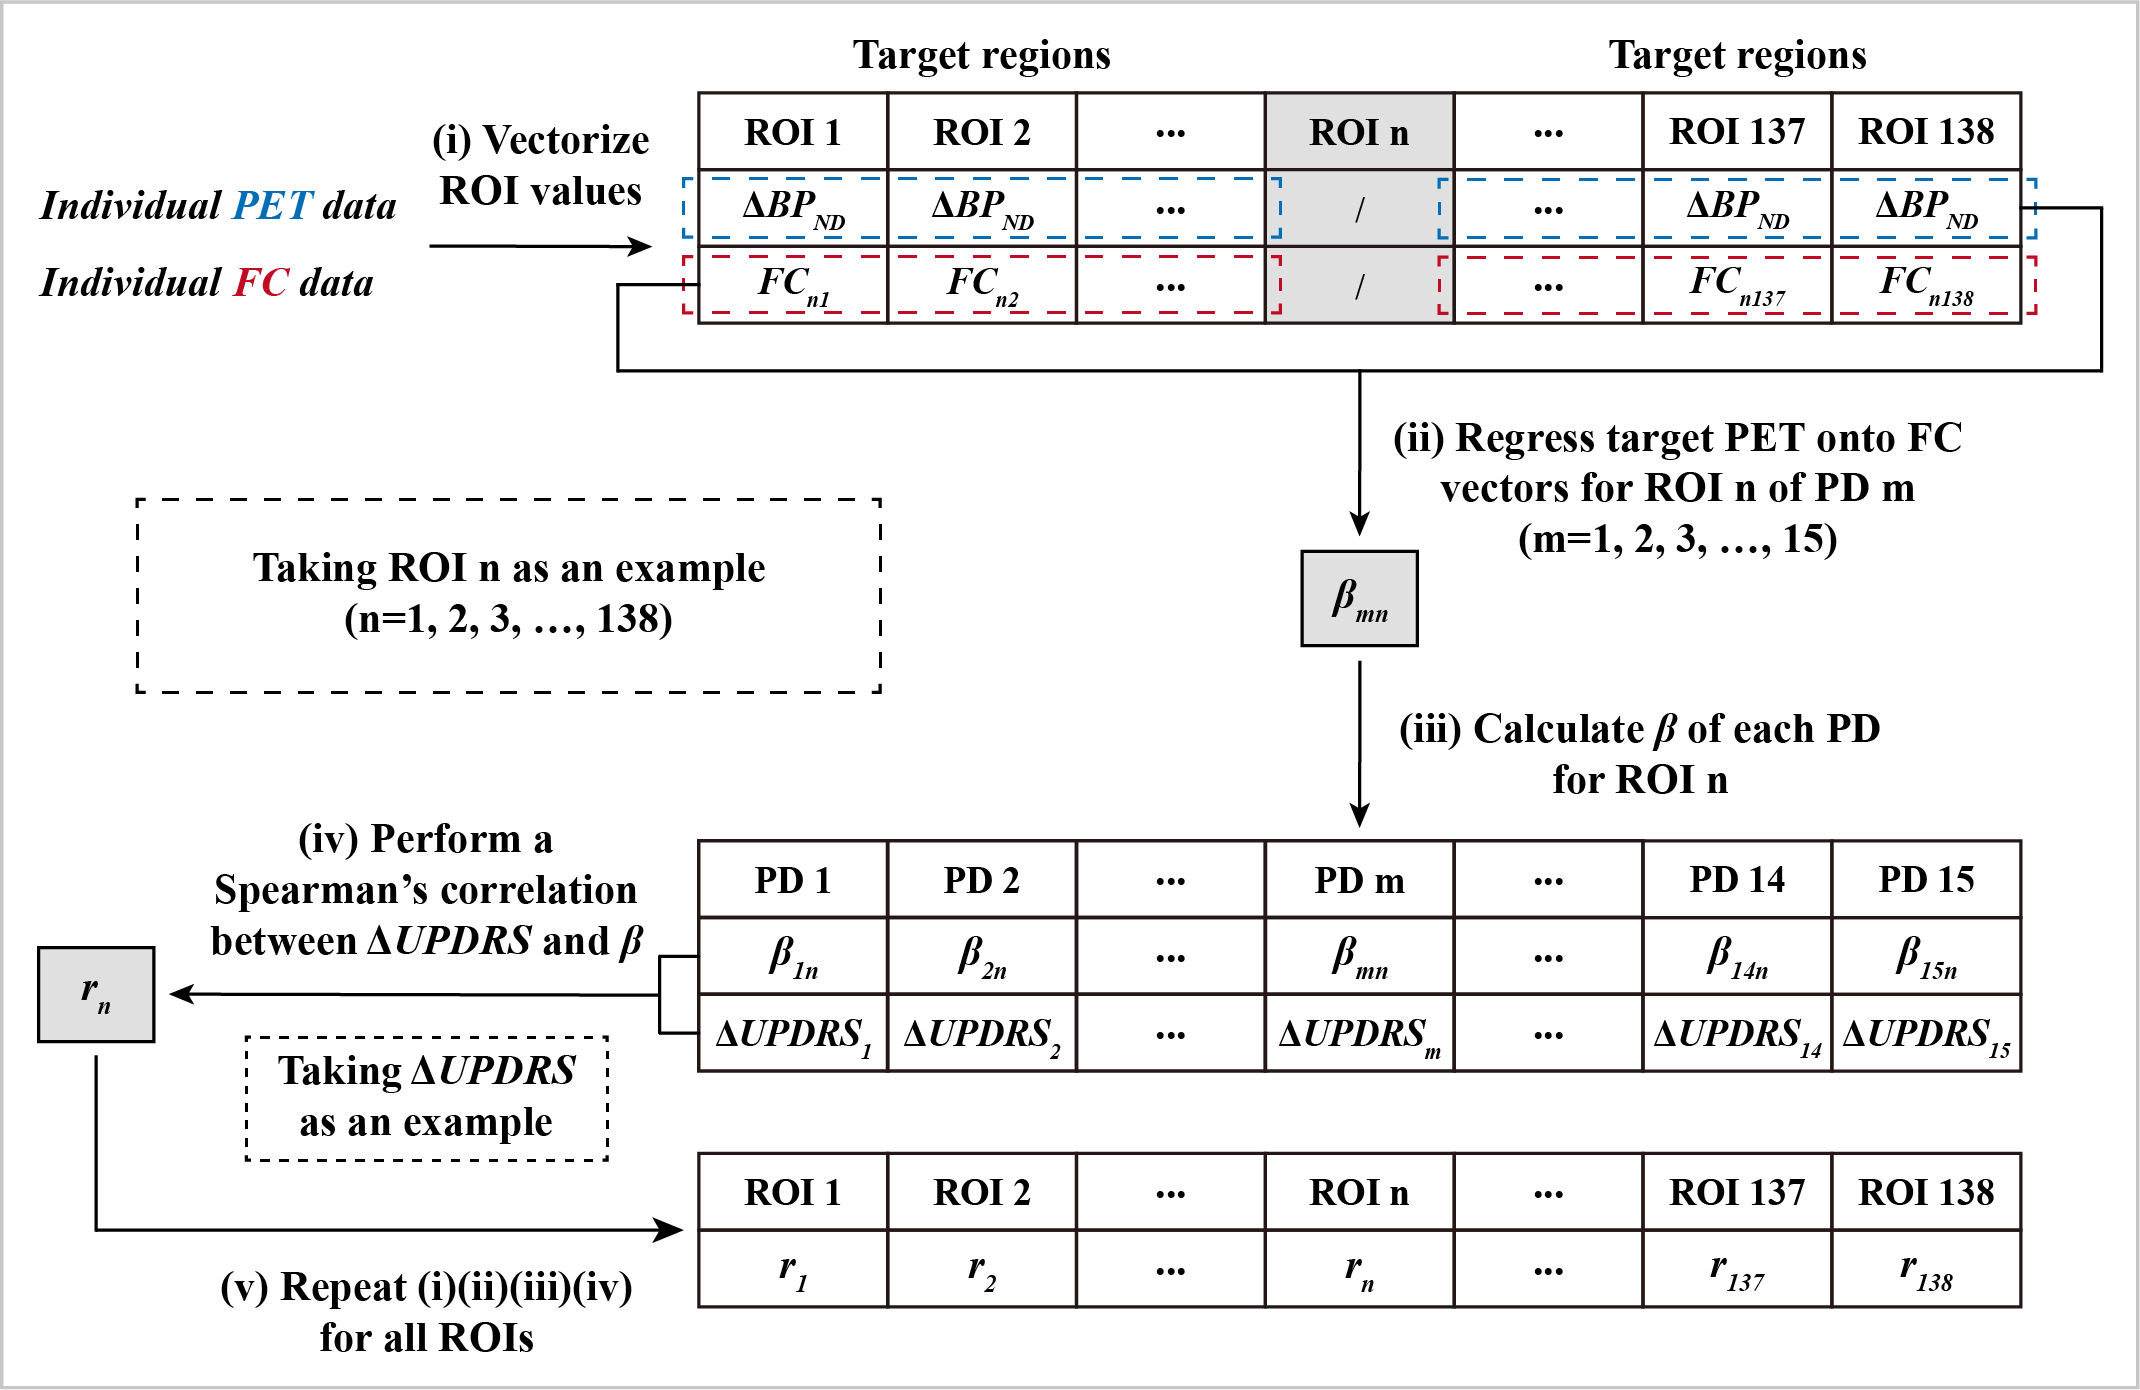


**Supplementary Figure 4**: Association between baseline functional connectivity and PET change covariance in PD patients at follow-up. Scatterplots showing the association between group-average functional connectivity and (A) 11C-PE2I PET change covariance and (B) 11C-DASB PET change covariance for the 8 brain networks.


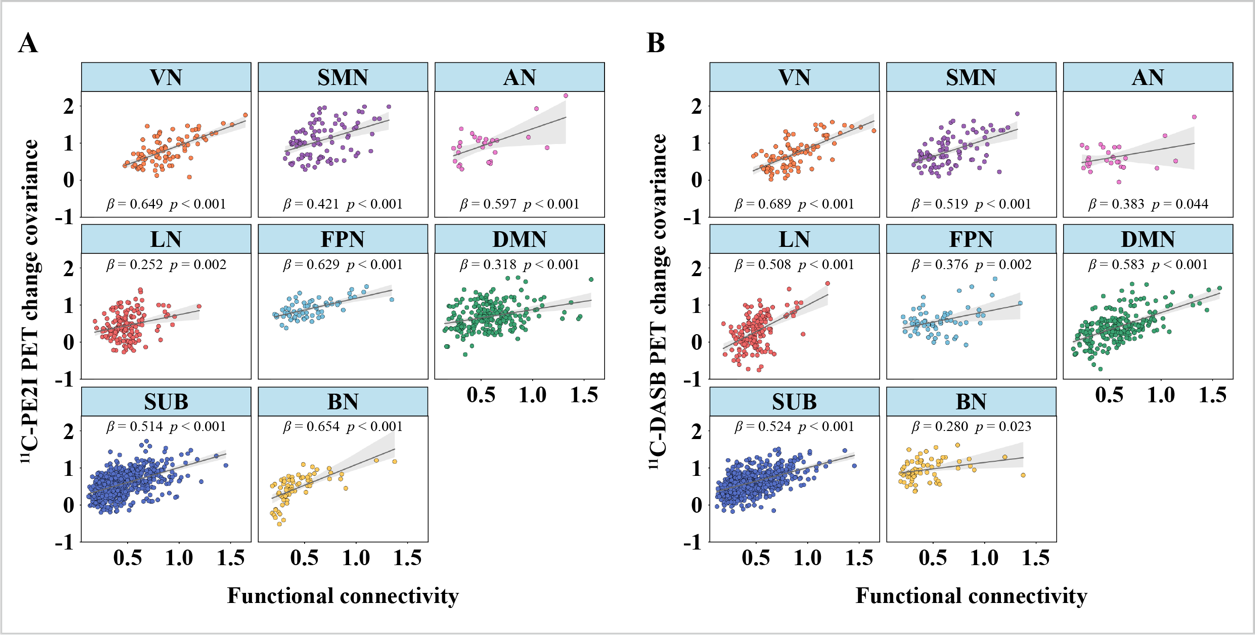


**Supplementary Figure 5**: Brain regions in which the association between baseline FC and change in PET uptake is correlated with changes in clinical measures in PD patients. UPDRS = Unified Parkinson’s disease rating scale; BR sub-score = bradykinesia-rigidity sub-score; BDI = Beck’s depression inventory; NMSS = Non-Motor Symptoms Scale; AES = Apathy Evaluation Scale; ACE-R = Addenbrooke's Cognitive Examination Revised; MMSE = Mini-mental State Examination; PDSS = Parkinson's disease sleep scale


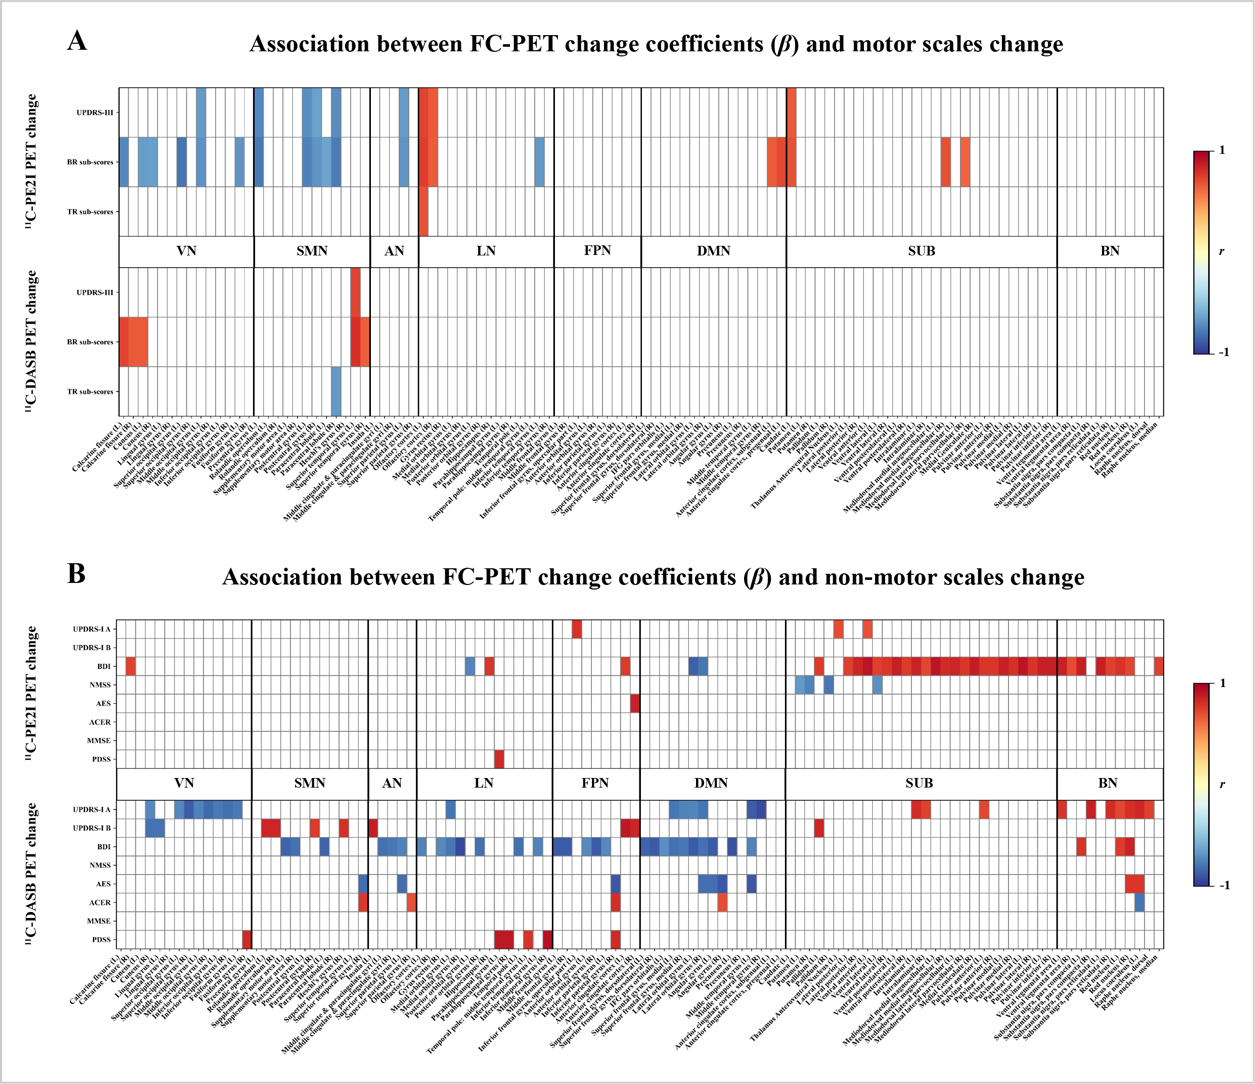

Supplement: Supplementary file 1 [file 3ceafe7207640e9f373b199b.docx]
